# Supplementary material for: Dual role for p16 in the metastasis process of HPV positive head and neck cancers
Source: PubMed Central journal article supplement (PMC5492443; doi:10.1186/s12943-017-0678-8), 2017-06-29

A

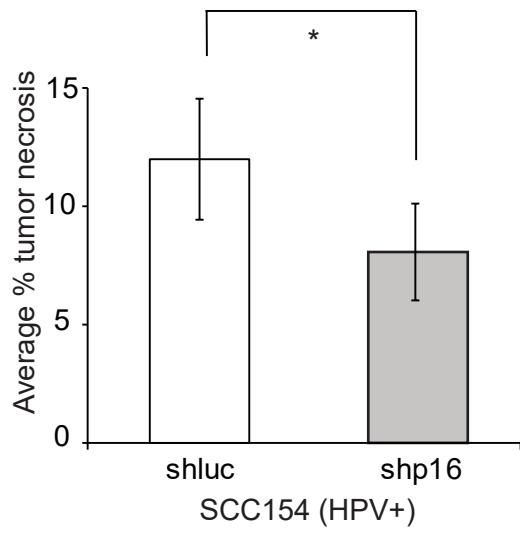

B

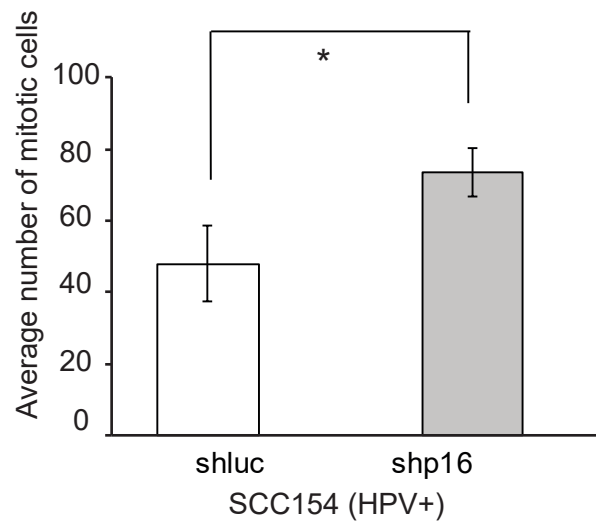

C

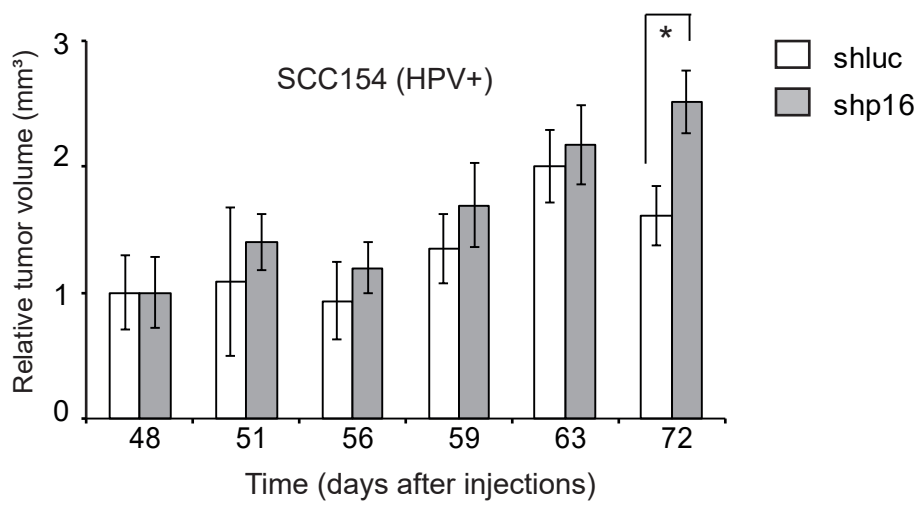

Supplement: 12943_2017_678_MOESM2_ESM.pdf [file 12943_2017_678_MOESM2_ESM.pdf]
