# Supplementary material for: Dual role for p16 in the metastasis process of HPV positive head and neck cancers
Source: Springer Nature journal article supplement (doi:10.1186/s12943-017-0678-8), 2017-06-29

A

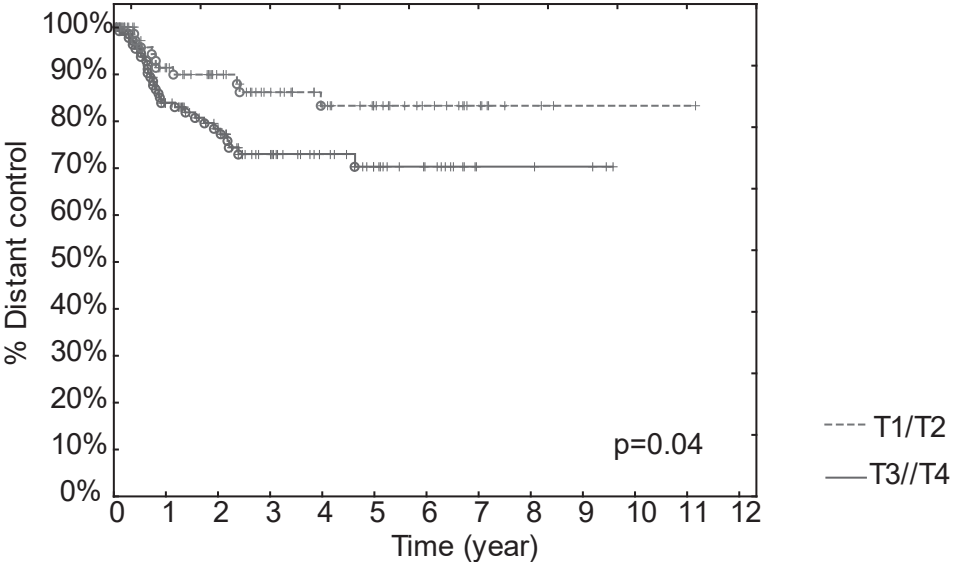

B

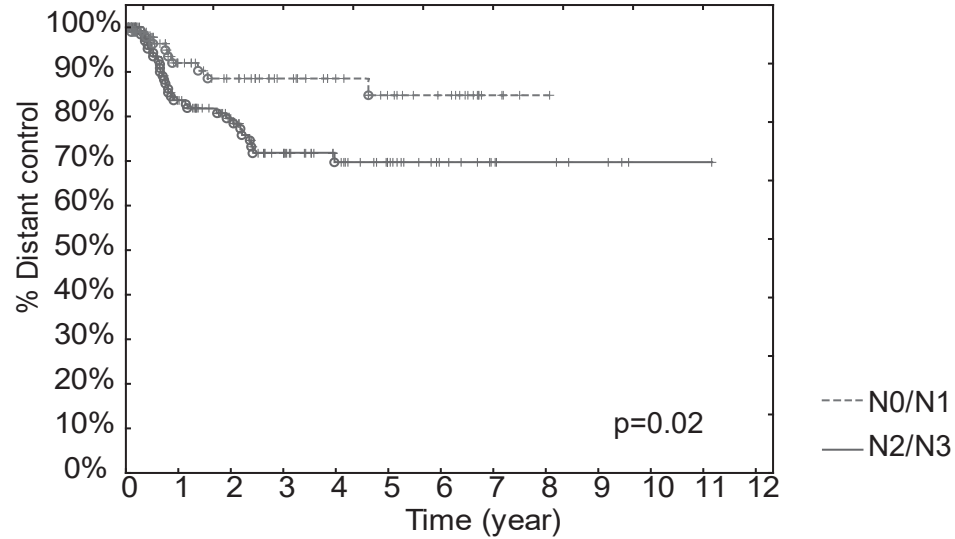

C

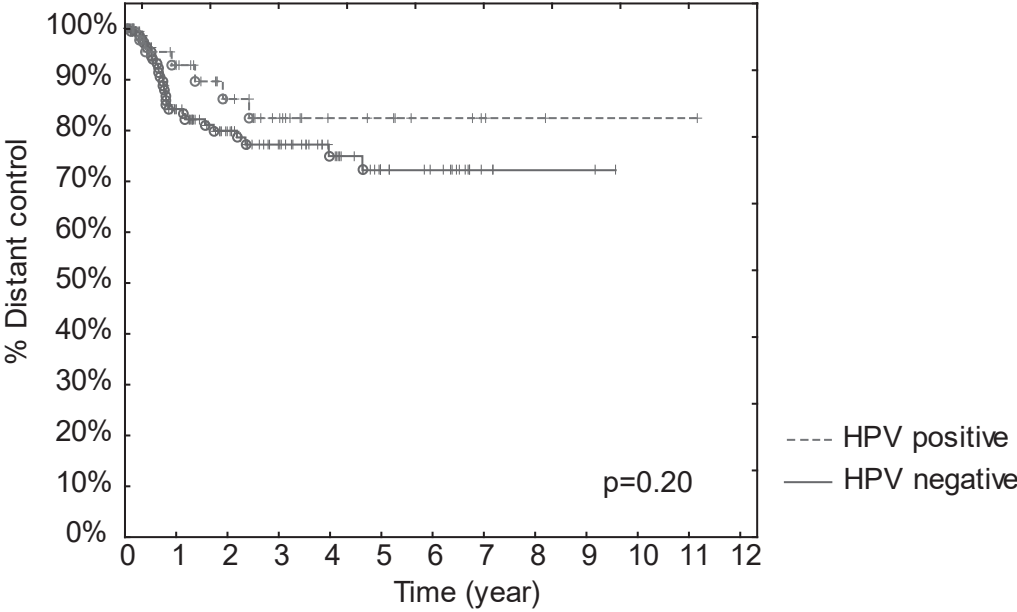

Supplement: MOESM1 [file 12493328]
